# Supplementary material for: Extracellular Proteolysis of Apolipoprotein E (apoE) by Secreted Serine Neuronal Protease
Source: PubMed Central journal article supplement (PMC3968057; doi:10.1371/journal.pone.0093120), 2014-03-27
Supplement: pone.0093120.s007.pdf [file pone.0093120.s007.pdf]

| BRC # | Diagnosis | Age | Sex | Race | PMD  | Brain region | Genotyping result       |
|-------|-----------|-----|-----|------|------|--------------|-------------------------|
| 0276  | AD        | 82  | F   | W    | 8    | MFG          | $\epsilon 3/\epsilon 3$ |
| 0364  | AD        | 89  | F   | W    | 7    | MFG          | $\epsilon 3/\epsilon 4$ |
| 0448  | AD        | 72  | F   | B    | 20   | MFG          | $\epsilon 4/\epsilon 4$ |
| 0461  | AD        | 61  | M   | W    | 20   | MFG          | $\epsilon 3/\epsilon 3$ |
| 0697  | AD        | 80  | F   | W    | 0    | MFG          | $\epsilon 3/\epsilon 4$ |
| 0769  | AD        | 72  | M   | W    | 7    | MFG          | $\epsilon 2/\epsilon 4$ |
| 0771  | AD        | 73  | M   | W    | 6    | MFG          | $\epsilon 3/\epsilon 4$ |
| 0901  | AD        | 83  | F   | W    | 6    | MFG          | $\epsilon 3/\epsilon 4$ |
| 0954  | AD        | 61  | F   | W    | 7    | MFG          | $\epsilon 3/\epsilon 4$ |
| 0973  | AD        | 78  | F   | W    | 8    | MFG          | $\epsilon 4/\epsilon 4$ |
| 0992  | AD        | 62  | F   | W    | 12   | MFG          | $\epsilon 3/\epsilon 4$ |
| 1004  | AD        | 63  | F   | W    | 11   | MFG          | $\epsilon 3/\epsilon 3$ |
| 1655  | AD        | 92  | F   | W    | 8    | MFG          | $\epsilon 3/\epsilon 4$ |
| 1663  | AD        | 63  | M   | W    | 9    | MFG          | $\epsilon 3/\epsilon 4$ |
| 1671  | AD        | 77  | M   | W    | 32   | MFG          | $\epsilon 4/\epsilon 4$ |
| 1678  | AD        | 92  | F   | B    | 13   | MFG          | $\epsilon 3/\epsilon 4$ |
| 1695  | AD        | 95  | F   | W    | 4    | MFG          | $\epsilon 3/\epsilon 4$ |
| 1705  | AD        | 79  | F   | W    | 7    | MFG          | $\epsilon 3/\epsilon 3$ |
| 1710  | AD        | 90  | F   | W    | 5    | MFG          | $\epsilon 3/\epsilon 4$ |
| 1821  | AD        | 85  | F   | W    | 18   | MFG          | $\epsilon 3/\epsilon 4$ |
| 1823  | AD        | 87  | F   | B    | 16   | MFG          | $\epsilon 3/\epsilon 4$ |
| 1829  | AD        | 94  | F   | W    | 4    | MFG          | $\epsilon 3/\epsilon 4$ |
| 1866  | AD        | 74  | F   |      | 5.5  | MFG          | $\epsilon 3/\epsilon 4$ |
| 1898  | AD        | 79  | M   | W    | 10.5 | MFG          | $\epsilon 4/\epsilon 4$ |
| 1935  | AD        | 72  | F   | W    | 19   | MFG          | $\epsilon 3/\epsilon 3$ |
| 2059  | AD        | 76  | M   | W    | 15   | MFG          | $\epsilon 3/\epsilon 4$ |
| 2060  | AD        | 77  | M   | W    | 20   | MFG          | $\epsilon 4/\epsilon 4$ |
| 2136  | AD        | 92  | F   | W    | 7    | MFG          | $\epsilon 3/\epsilon 3$ |
| 2153  | AD        | 69  | M   | W    | 10.5 | MFG          | $\epsilon 4/\epsilon 4$ |
| 2273  | AD        | 62  | F   | W    | 22   | MFG          | $\epsilon 4/\epsilon 4$ |
